# Supplementary material for: VivosX, a disulfide crosslinking method to capture site-specific, protein-protein interactions in yeast and human cells
Source: eLife. 2018 Aug 9;7:e36654. doi: 10.7554/eLife.36654 (PMC6107336; doi:10.7554/eLife.36654)
Supplement: Figure 1—source data 1. [file elife-36654-fig1-data1.xlsx]

## Sheet: Sheet2
	replicate 1				replicate 2				replicate 3
	ZxZ	monoZ	(ZxZ / totalZ)%	(monoZ / totalZ)%	ZxZ	monoZ	(ZxZ / totalZ)%	(monoZ / totalZ)%	ZxZ	monoZ	(ZxZ / totalZ)%	(monoZ / totalZ)%
H44C	0.0427272	11.9192	0.357194	99.6428	0.223732	12.5891	1.74615	98.2538	0.0989301	13.8593	0.708759	99.2912
A45C	2.02583	10.2054	16.5627	83.4373	1.93844	9.09644	17.5665	82.4335	1.87186	11.4437	14.0577	85.9423
T46C	2.66839	8.94916	22.9686	77.0314	2.93059	6.05417	32.6173	67.3827	3.88801	7.53402	34.0396	65.9604
T46C	4.31889	12.1157	26.2793	73.7207	3.76231	12.3311	23.3779	76.6221	6.29808	12.2418	33.9704	66.0296
G47C	2.1667	6.56512	24.8138	75.1862	2.18761	8.77746	19.9507	80.0493	3.30513	12.4078	21.0344	78.9656
R48C	2.77789	4.03672	40.7638	59.2362	0.826465	4.82048	14.6356	85.3644	1.9863	4.81078	29.2228	70.7772
T49C	0	12.6972	0	100	0	11.4452	0	100	0	10.3299	0	100
	average	average	stdev	stdev
	(ZxZ / totalZ)%	(monoZ / totalZ)%	(ZxZ / totalZ)%	(monoZ / totalZ)%	N =
H44C	0.937368	99.0626	0.722149	0.722149	3
A45C	16.0623	83.9377	1.80713	1.80713	3
T46C	28.8755	71.1245	5.26273	5.26273	6
G47C	21.933	78.067	2.55303	2.55303	3
R48C	28.2074	71.7926	13.0937	13.0937	3
T49C	0	100	0	0	3
