# Supplementary material for: VivosX, a disulfide crosslinking method to capture site-specific, protein-protein interactions in yeast and human cells
Source: eLife. 2018 Aug 9;7:e36654. doi: 10.7554/eLife.36654 (PMC6107336; doi:10.7554/eLife.36654)
Supplement: Figure 2—source data 1. [file elife-36654-fig2-data1.xlsx]

## Sheet: Sheet3
	Replicate 1				Replicate 2				Replicate 3
	AxA	monoA	(AxA / totalA) %	(monoA / Total A) %	AxA	monoA	(AxA / totalA) %	(monoA / Total A) %	AxA	monoA	(AxA / totalA) %	(monoA / Total A) %
G38C	1.2486	14.1256	8.1214	91.8786	1.85452	14.3692	11.4309	88.5691	0.844325	16.1278	4.97478	95.0252
N39C	12.288	10.0439	55.0243	44.9757	16.1203	6.99749	69.7312	30.2688	5.15221	7.4696	40.8199	59.1801
N39C	7.74411	8.70184	47.0882	52.9118	10.1108	9.49852	51.5612	48.4388	6.95471	8.10624	46.1771	53.8229
A40C	10.6832	7.18294	59.7958	40.2042	10.5251	6.83088	60.6425	39.3575	6.42519	3.45965	65.0005	34.9995
Y41C	4.28203	7.00301	37.9443	62.0557	4.51991	6.96447	39.357	60.643	2.88153	6.02858	32.34	67.66
Q42C	7.54514	3.83868	66.2795	33.7205	3.91599	3.59121	52.1631	47.8369	5.52496	3.95155	58.3016	41.6984
	average	average	stdev	stdev
	(AxA / totalA) %	(monoA / Total A) %	(AxA / totalA) %	(monoA / Total A) %	N =
G38C	8.17569	91.8243	3.22839	3.22839	3
N39C	51.7337	48.2663	10.0632	10.0632	6
A40C	61.8129	38.1871	2.79277	2.79277	3
Y41C	36.5471	63.4529	3.71129	3.71129	3
Q42C	58.9148	41.0852	7.07815	7.07815	3
