# Supplementary material for: VivosX, a disulfide crosslinking method to capture site-specific, protein-protein interactions in yeast and human cells
Source: eLife. 2018 Aug 9;7:e36654. doi: 10.7554/eLife.36654 (PMC6107336; doi:10.7554/eLife.36654)
Supplement: Figure 5—source data 1. [file elife-36654-fig5-data1.xlsx]

## Sheet: Sheet2
		Replicate 1		Replicate 2		Replicate 3
		(ZxZ/ totalZ) %	(monoZ / totalZ) %	(ZxZ/ totalZ) %	(monoZ / totalZ) %	(ZxZ/ totalZ) %	(monoZ / totalZ) %
no FRP	no RAP	20.4966	79.5034	14.9165	85.0835	17.1162	82.8838
no FRB	RAP	17.7964	82.2036	16.6461	83.3539	12.0166	87.9834
TBP-FRB	no RAP	21.3058	78.6942	23.5483	76.4517	19.0625	80.9375
TBP-FRB	RAP	41.0902	58.9098	35.9053	64.0947	38.0257	61.9743
swc5-FRB	no RAP	18.8726	81.1274	14.5917	85.4083	15.4433	84.5567
swc5-FRB	RAP	1.36591	98.6341	4.3722	95.6278	4.31378	95.6862
		Average	Average	stdev	stdev
		(ZxZ/ totalZ) %	(monoZ / totalZ) %	(ZxZ/ totalZ) %	(monoZ / totalZ) %	N =
no FRP	no RAP	17.5098	82.4902	2.81083	2.81083	3
no FRB	RAP	15.4864	84.5136	3.05948	3.05948	3
TBP-FRB	no RAP	21.3055	78.6945	2.24289	2.24289	3
TBP-FRB	RAP	38.3404	61.6596	2.60674	2.60674	3
swc5-FRB	no RAP	16.3025	83.6975	2.26608	2.26608	3
swc5-FRB	RAP	3.35063	96.6494	1.71907	1.71907	3
