# Supplementary material for: VivosX, a disulfide crosslinking method to capture site-specific, protein-protein interactions in yeast and human cells
Source: eLife. 2018 Aug 9;7:e36654. doi: 10.7554/eLife.36654 (PMC6107336; doi:10.7554/eLife.36654)
Supplement: Figure 5—source data 2. [file elife-36654-fig5-data2.xlsx]

## Sheet: Sheet1
		replicate 1			replicate 2			replicate 3
		(ZxZ/ totalZ) %	(AxZ/ totalZ) %	(monoZ/ totalZ) %	(ZxZ/ totalZ) %	(AxZ/ totalZ) %	(monoZ/ totalZ) %	(ZxZ/ totalZ) %	(AxZ/ totalZ) %	(monoZ/ totalZ) %
TBP-FRB HTZ1(T46C) HTA1(N39C)	no RAP	19.6815	18.2638	62.0547	19.1605	24.712	56.1274	19.3255	26.8174	53.8571
	RAP	34.1524	17.1648	48.6828	27.4936	21.7196	50.7868	31.7636	25.3206	42.9157
		average	average	average	stdev	stdev	stdev
		(ZxZ/ totalZ) %	(AxZ/ totalZ) %	(monoZ/ totalZ) %	(ZxZ/ totalZ) %	(AxZ/ totalZ) %	(monoZ/ totalZ) %	N =
TBP-FRB HTZ1(T46C) HTA1(N39C)	no RAP	19.3892	23.2644	57.3464	0.266244	4.45674	4.23256	3
	RAP	31.1366	21.4017	47.4618	3.3734	4.08719	4.07514	3
