# Supplementary material for: VivosX, a disulfide crosslinking method to capture site-specific, protein-protein interactions in yeast and human cells
Source: eLife journal article supplement (doi:10.7554/elife.36654), 2018-08-09

Figure 1--figure supplement 2

A

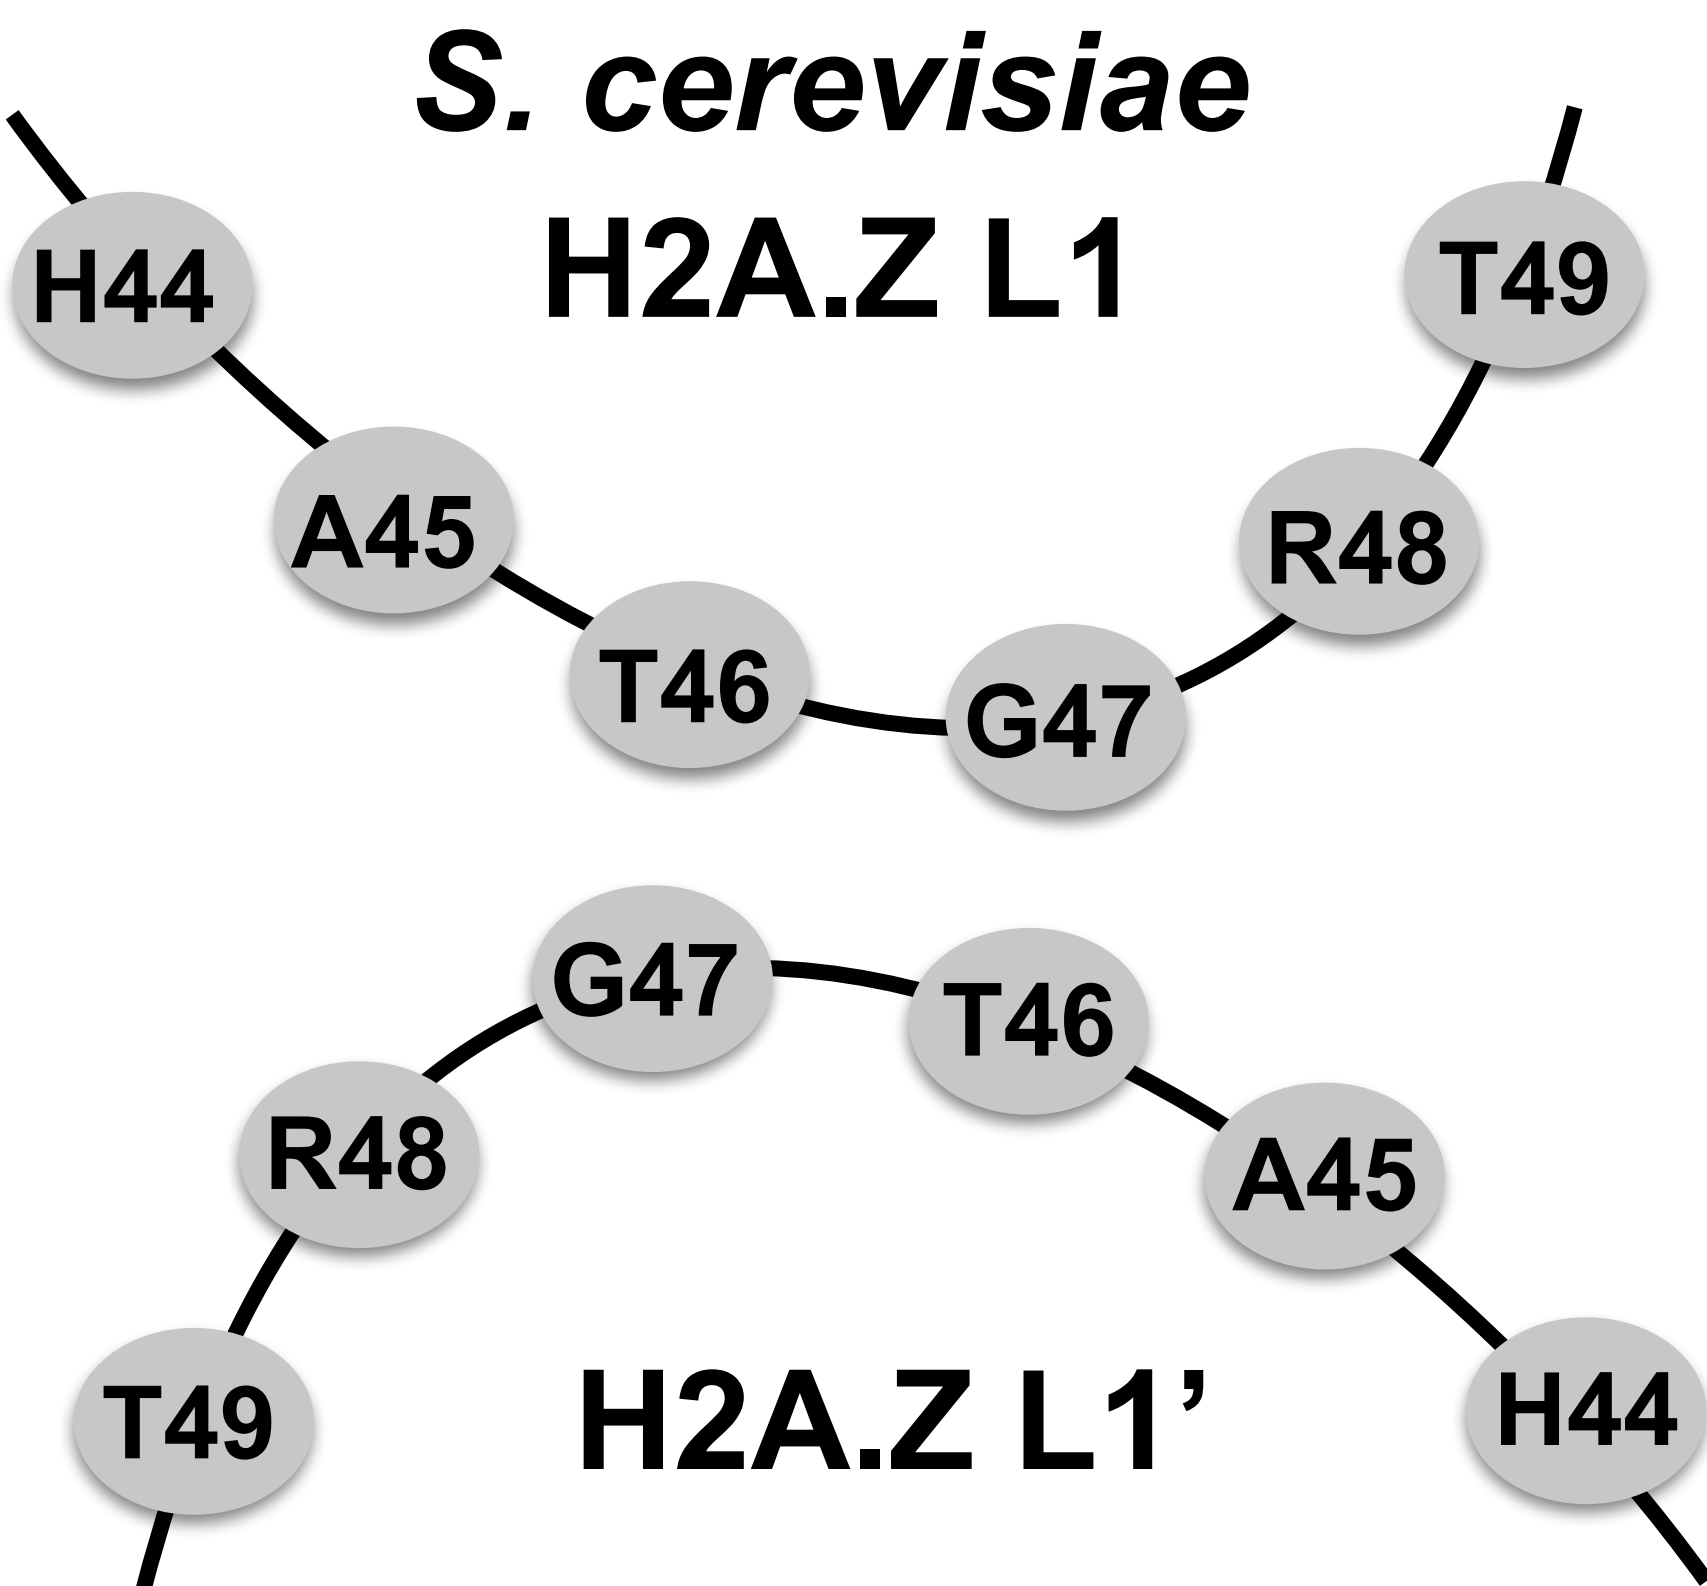

C

| L1 position | Cα-Cα' (Å) |
|-------------|------------|
| Htz1(H44C)  | 9.8        |
| Htz1(A45C)  | 7.8        |
| Htz1(T46C)  | 5.4        |
| Htz1(G47C)  | 4.6        |
| Htz1(R48C)  | 8.2        |
| Htz1(T49C)  | 11.7       |
| Hta1(G38C)  | 13.2       |
| Hta1(N39C)  | 3.8        |
| Hta1(Y40C)  | 8.1        |
| Hta1(A41C)  | 10.9       |
| Hta1(Q42C)  | 10.5       |

B

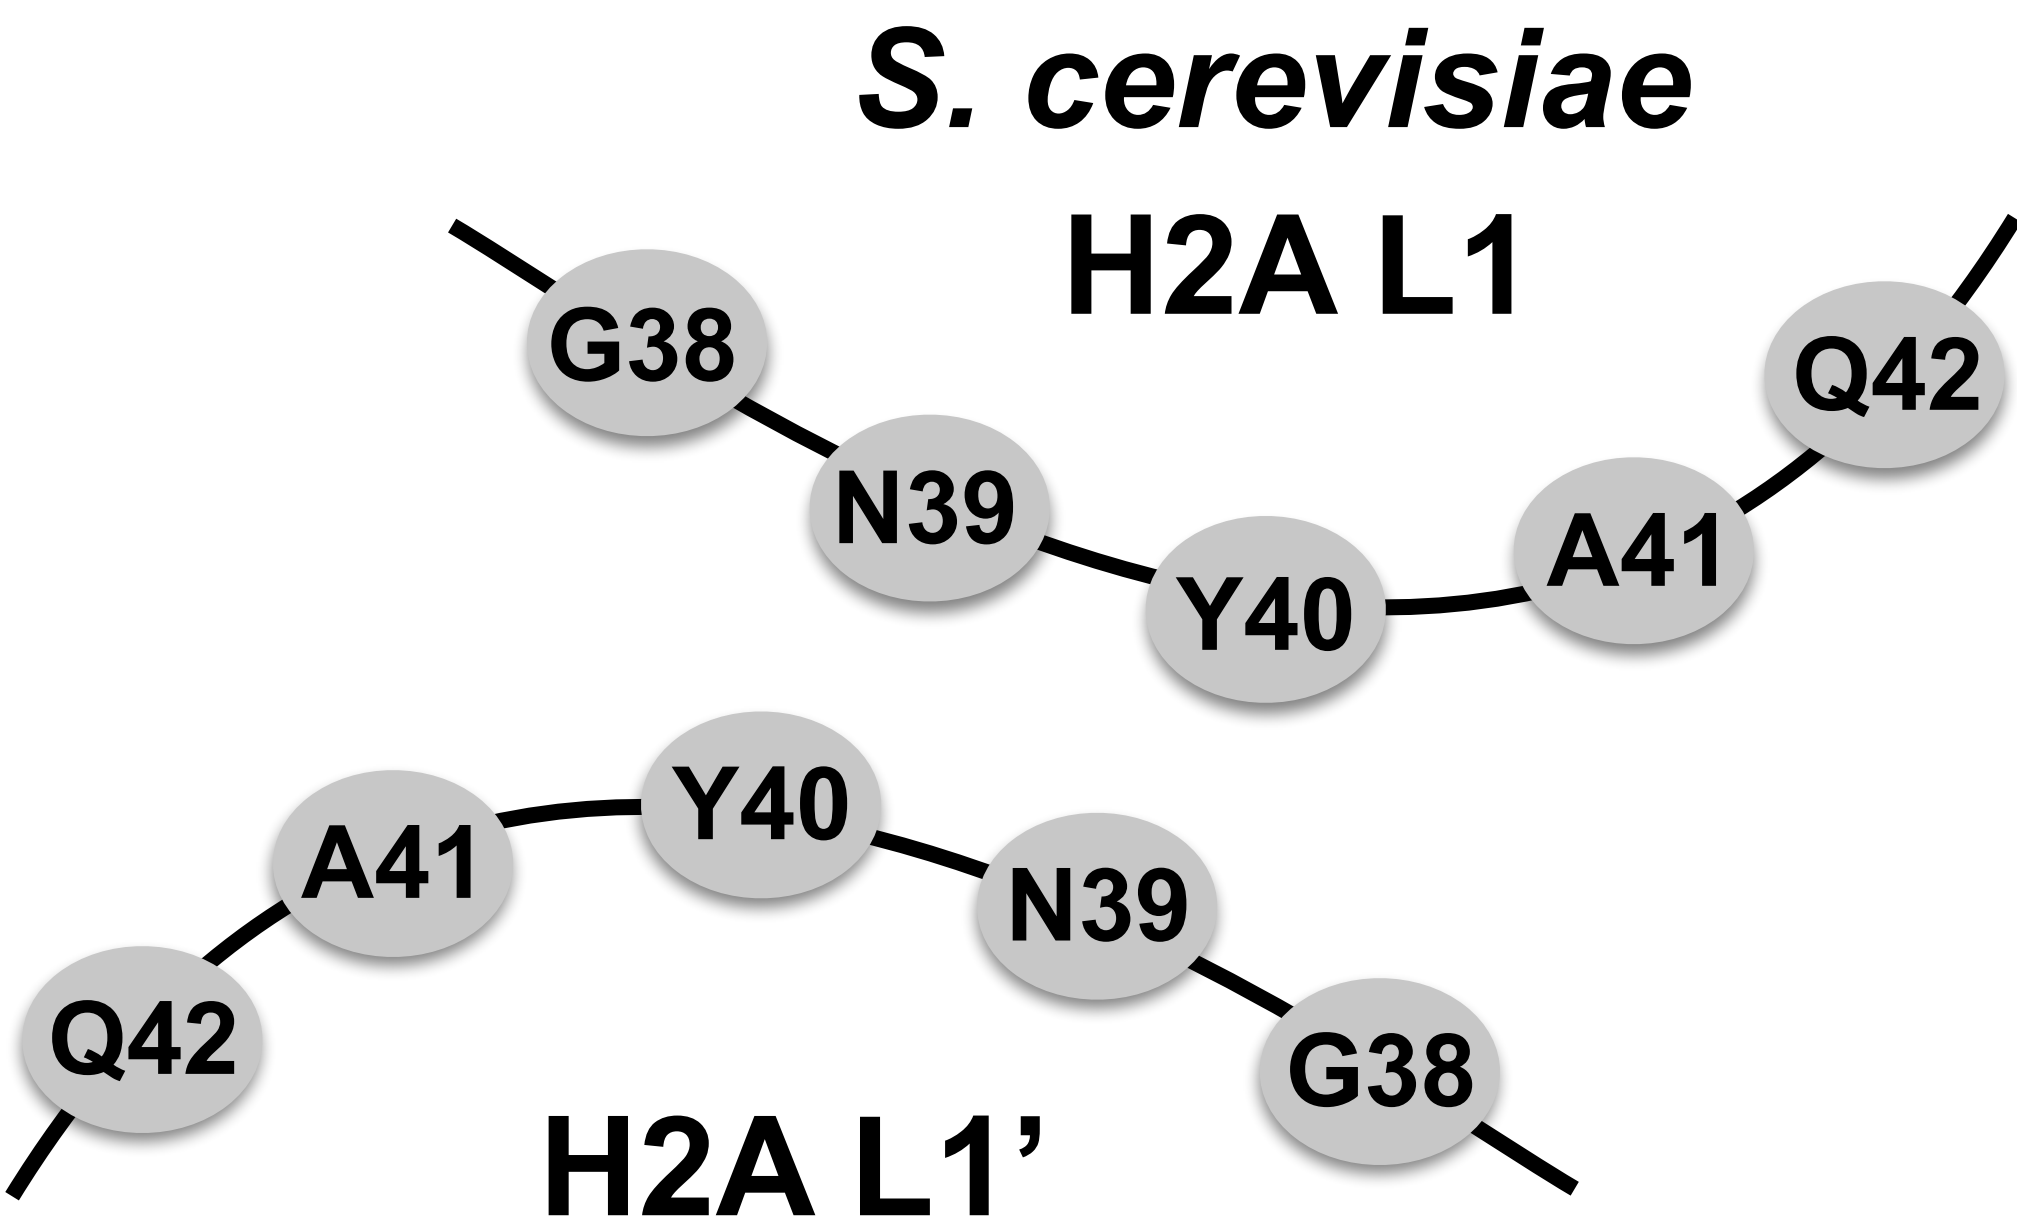

Supplement: supp [file elife_poa_e36654_Figure_1_figure_supplement_2.pdf › elife_poa_e36654_Figure_1_figure_supplement_2.pdf]
