# Supplementary figures and images for: VivosX, a disulfide crosslinking method to capture site-specific, protein-protein interactions in yeast and human cells
Source: eLife journal article supplement (doi:10.7554/elife.36654), 2018-08-09

Figure 1--figure supplement 1

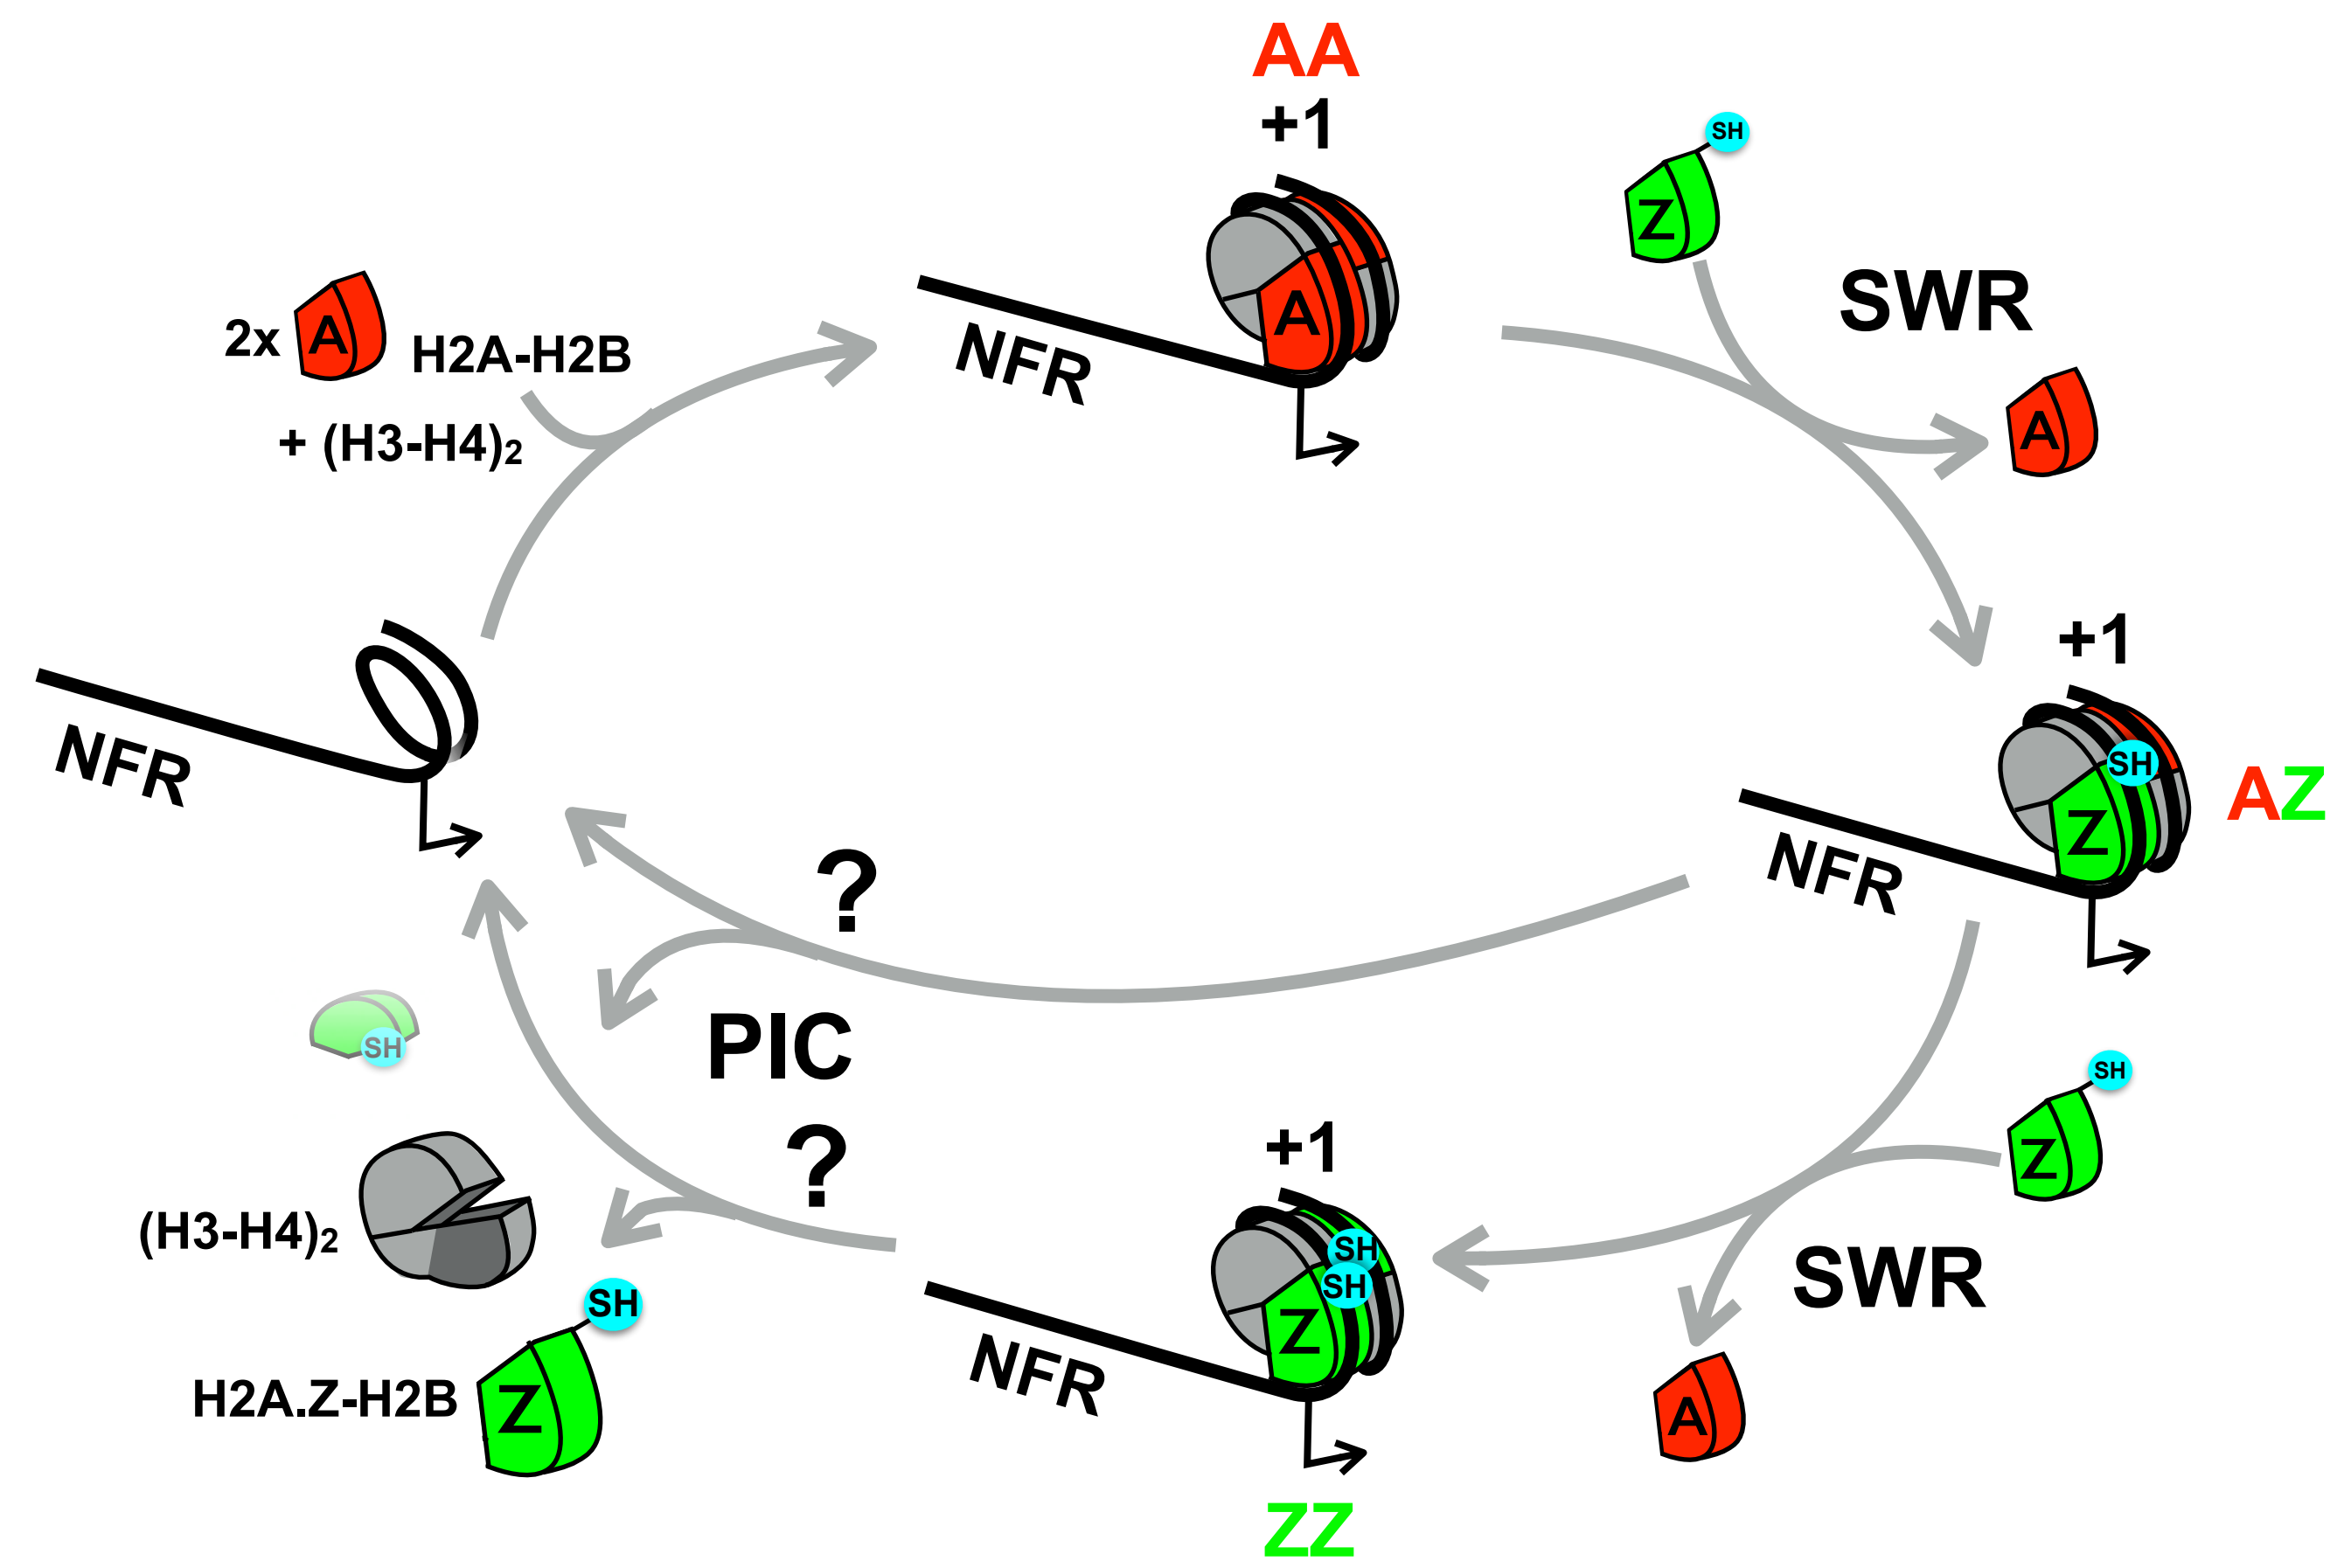

Supplement: supp [file elife_poa_e36654_Figure_1_figure_supplement_1.pdf › elife_poa_e36654_Figure_1_figure_supplement_1.pdf]

Figure 1--figure supplement 3

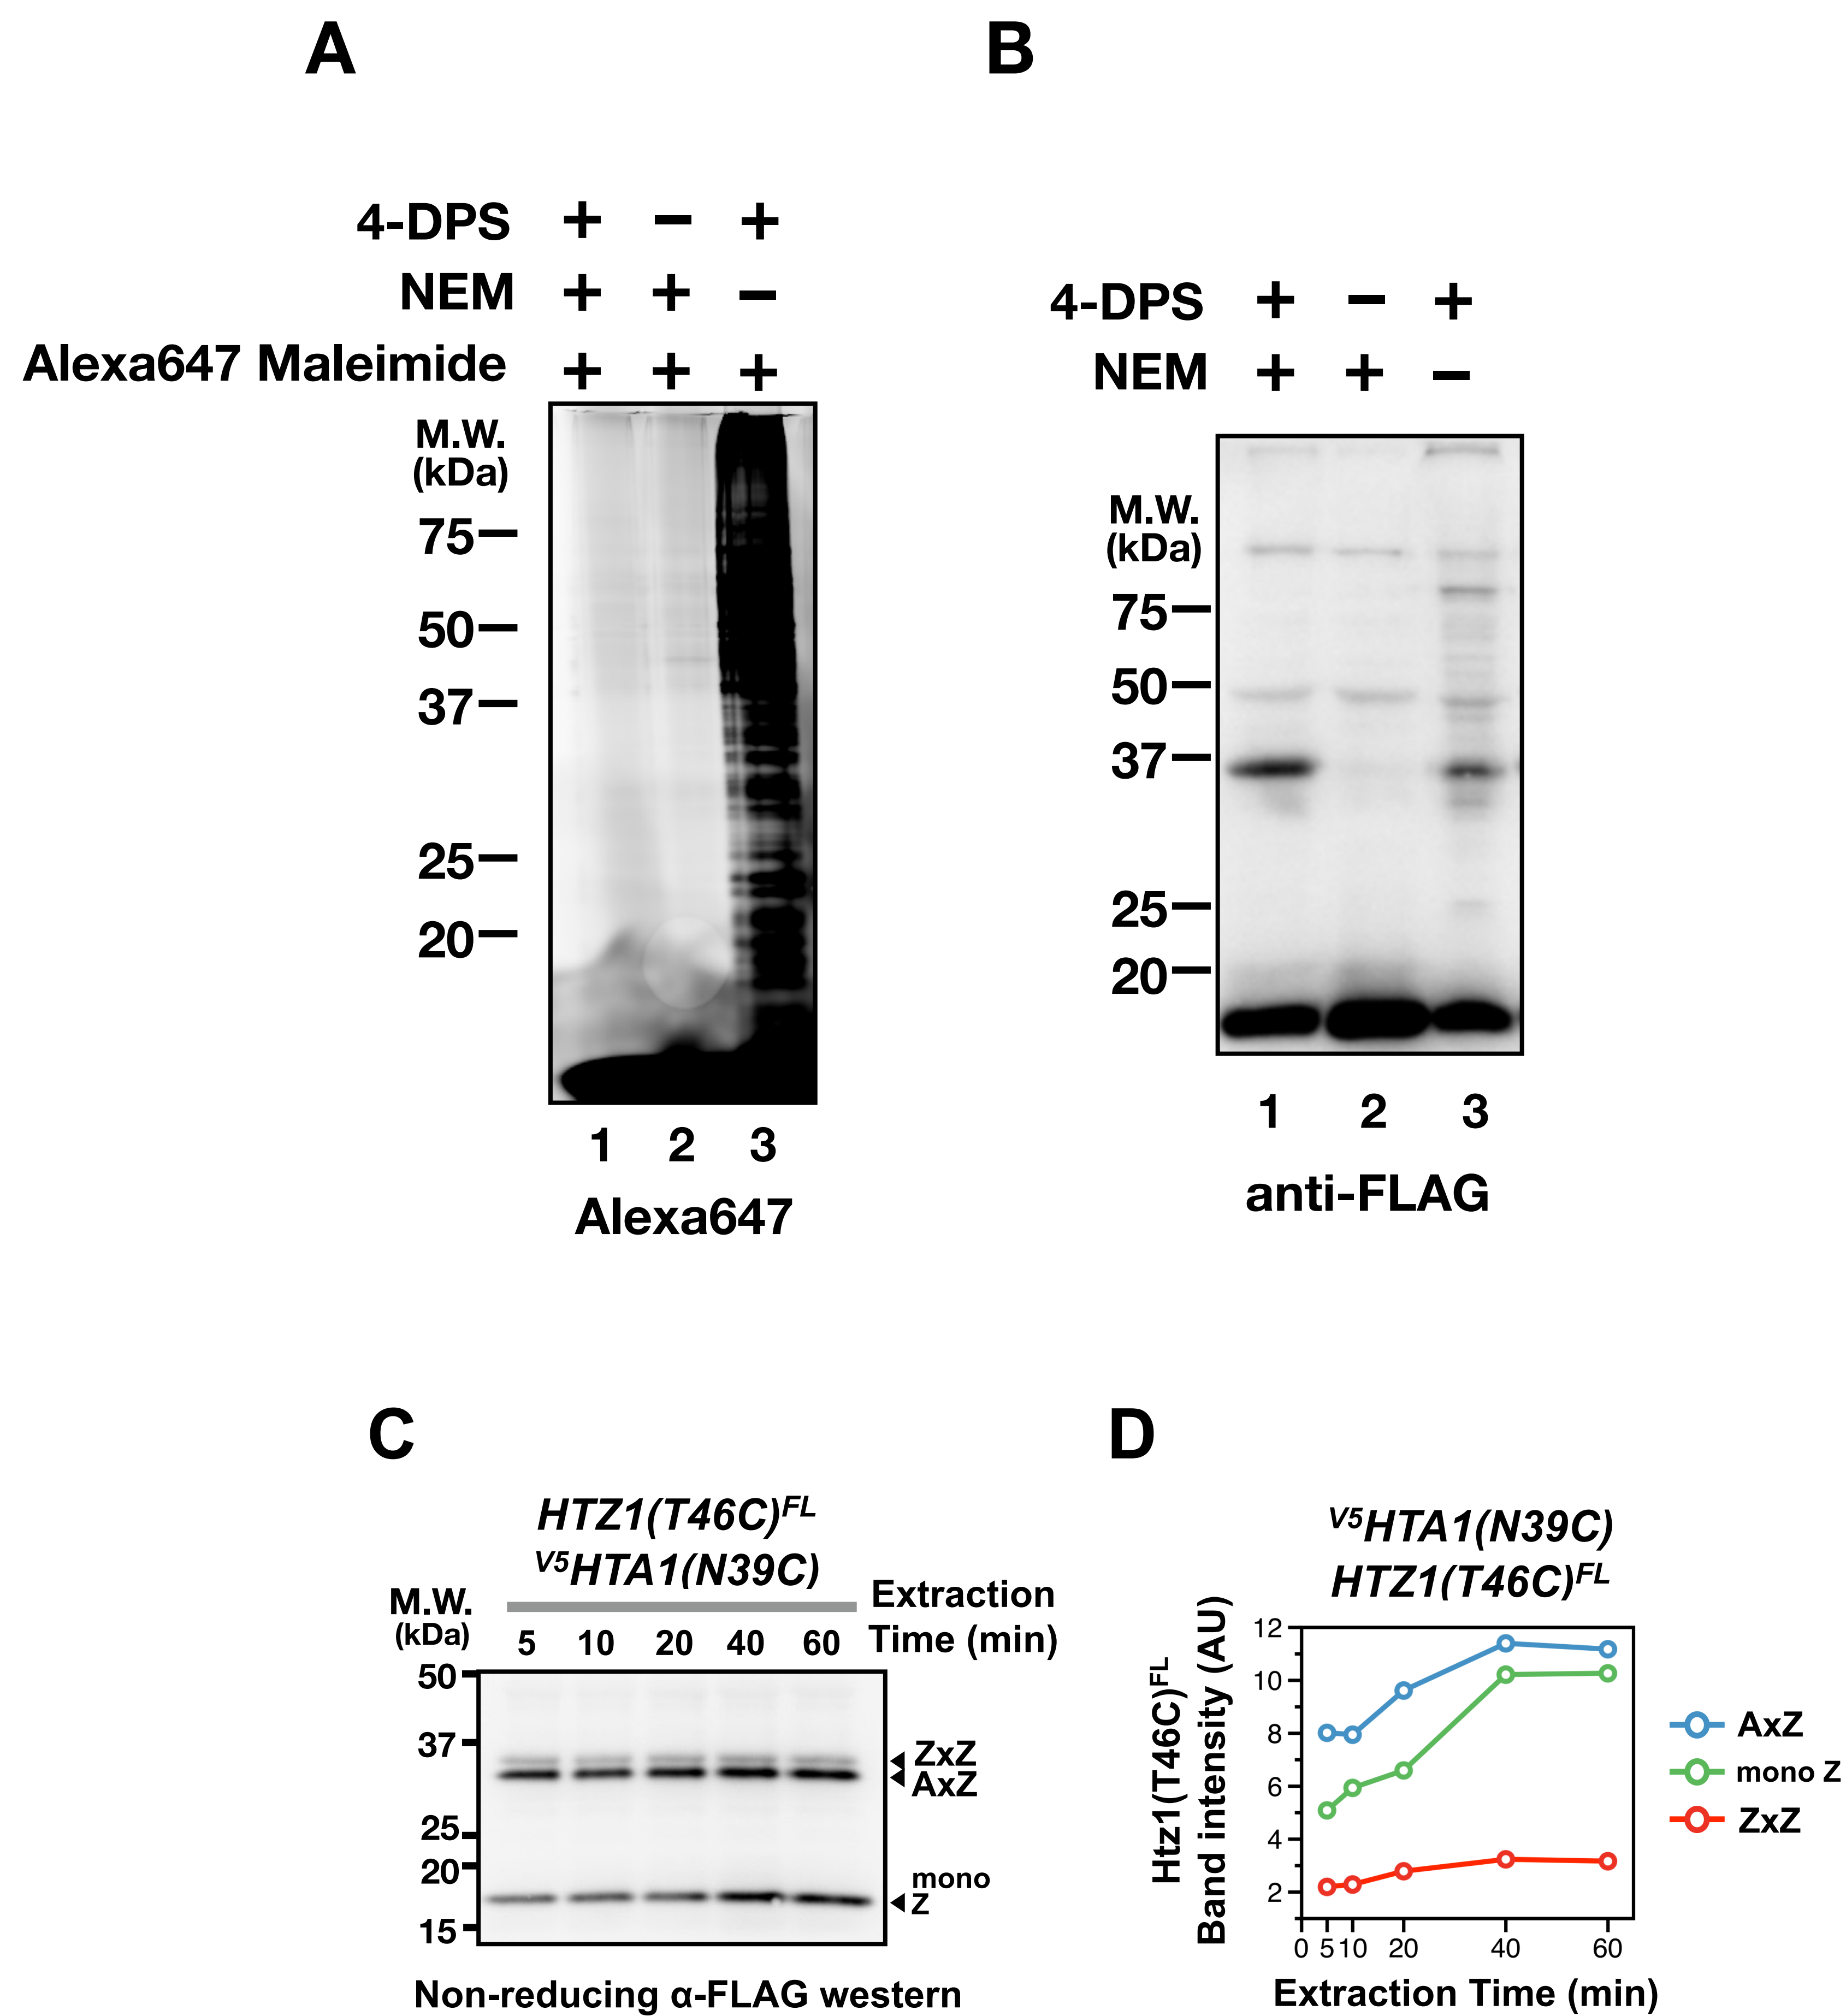

Supplement: supp [file elife_poa_e36654_Figure_1_figure_supplement_3.pdf › elife_poa_e36654_Figure_1_figure_supplement_3.pdf]

Figure 1--figure supplement 4

**A**

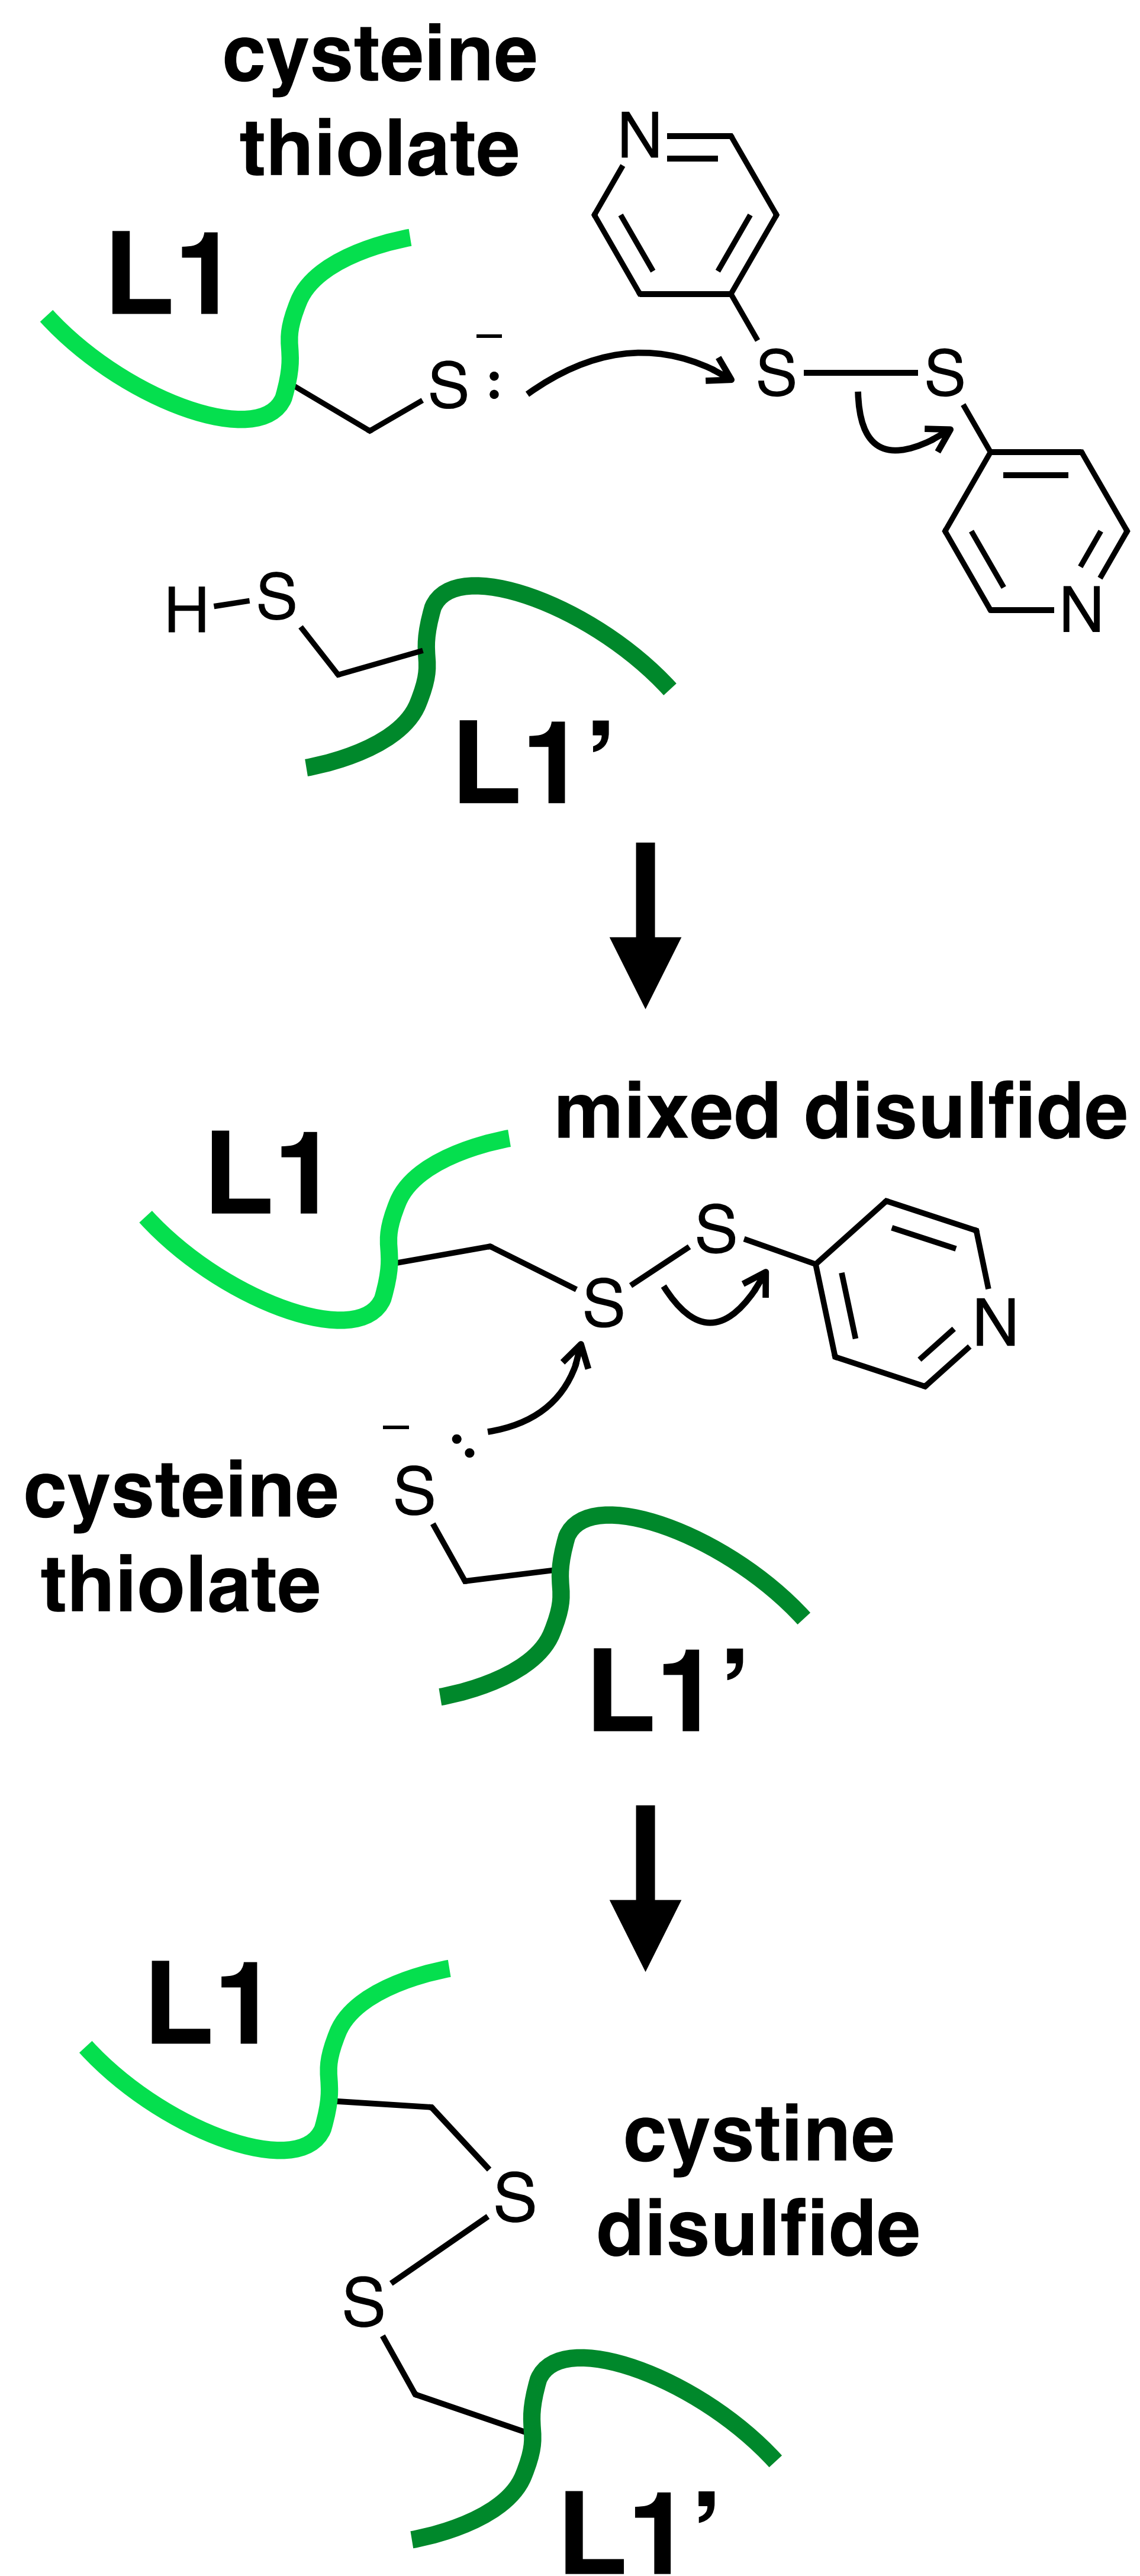

**B**

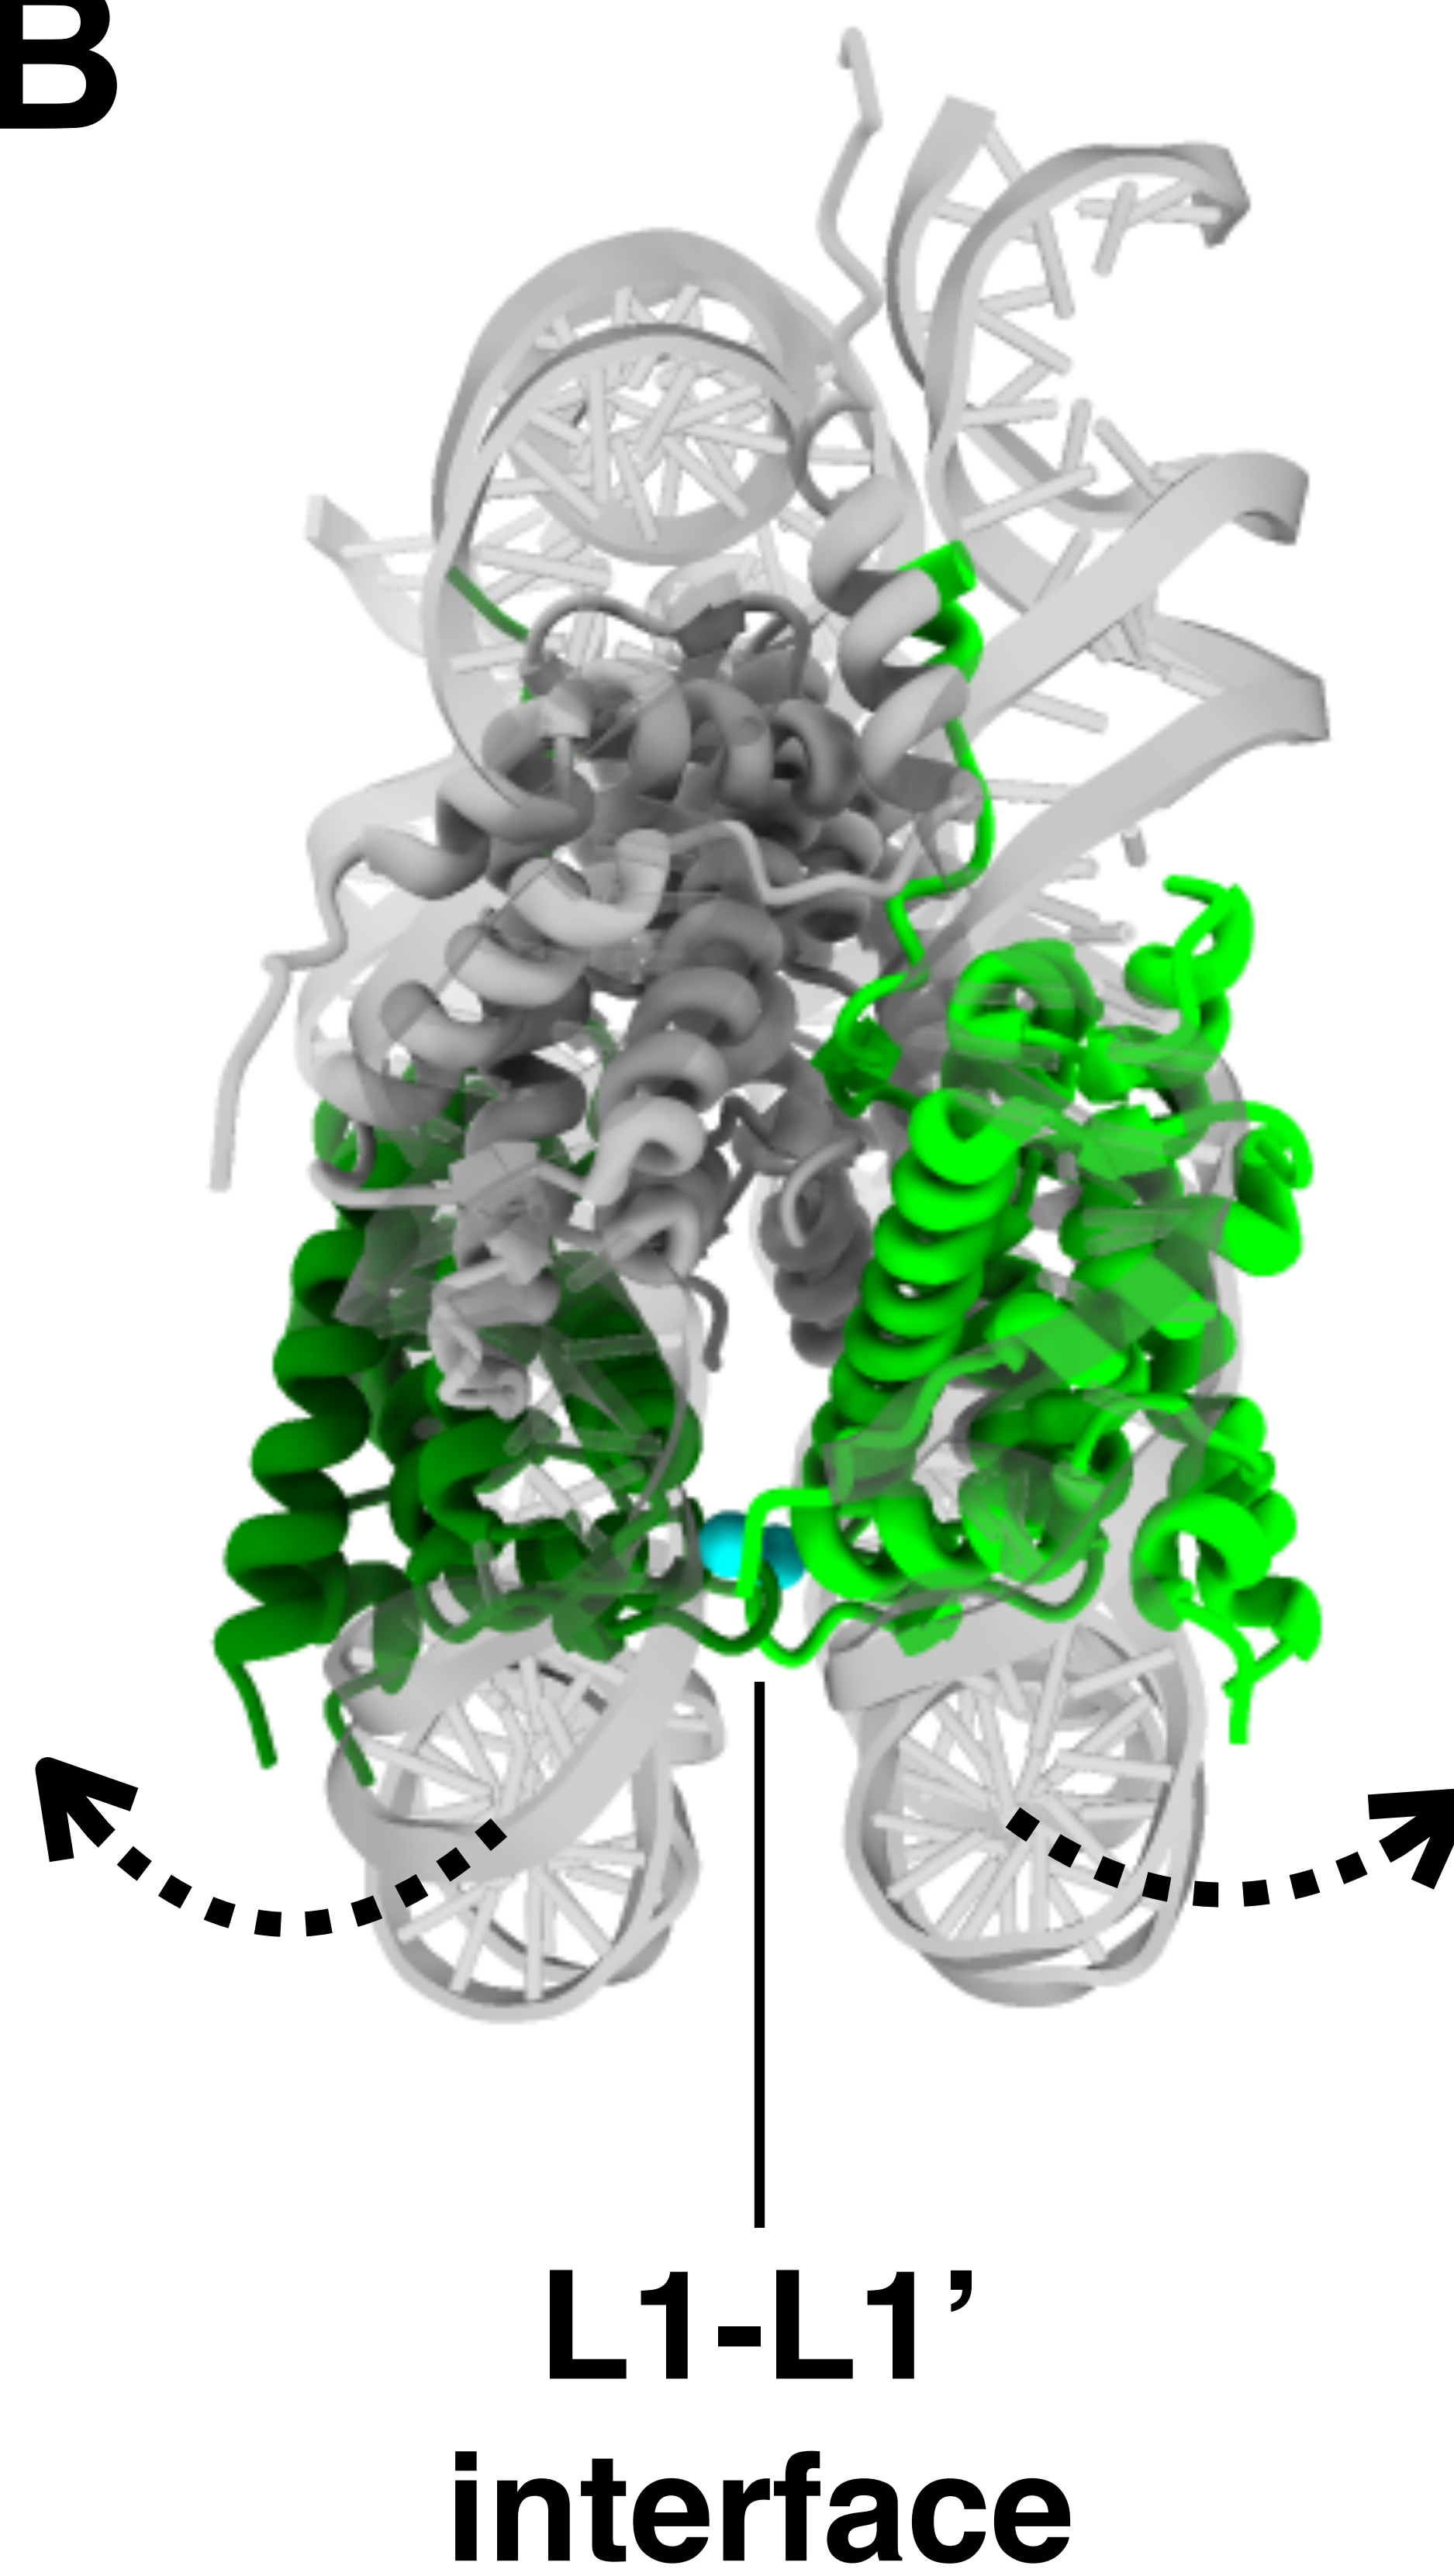

Supplement: supp [file elife_poa_e36654_Figure_1_figure_supplement_4.pdf › elife_poa_e36654_Figure_1_figure_supplement_4.pdf]

Figure 3--figure supplement 1

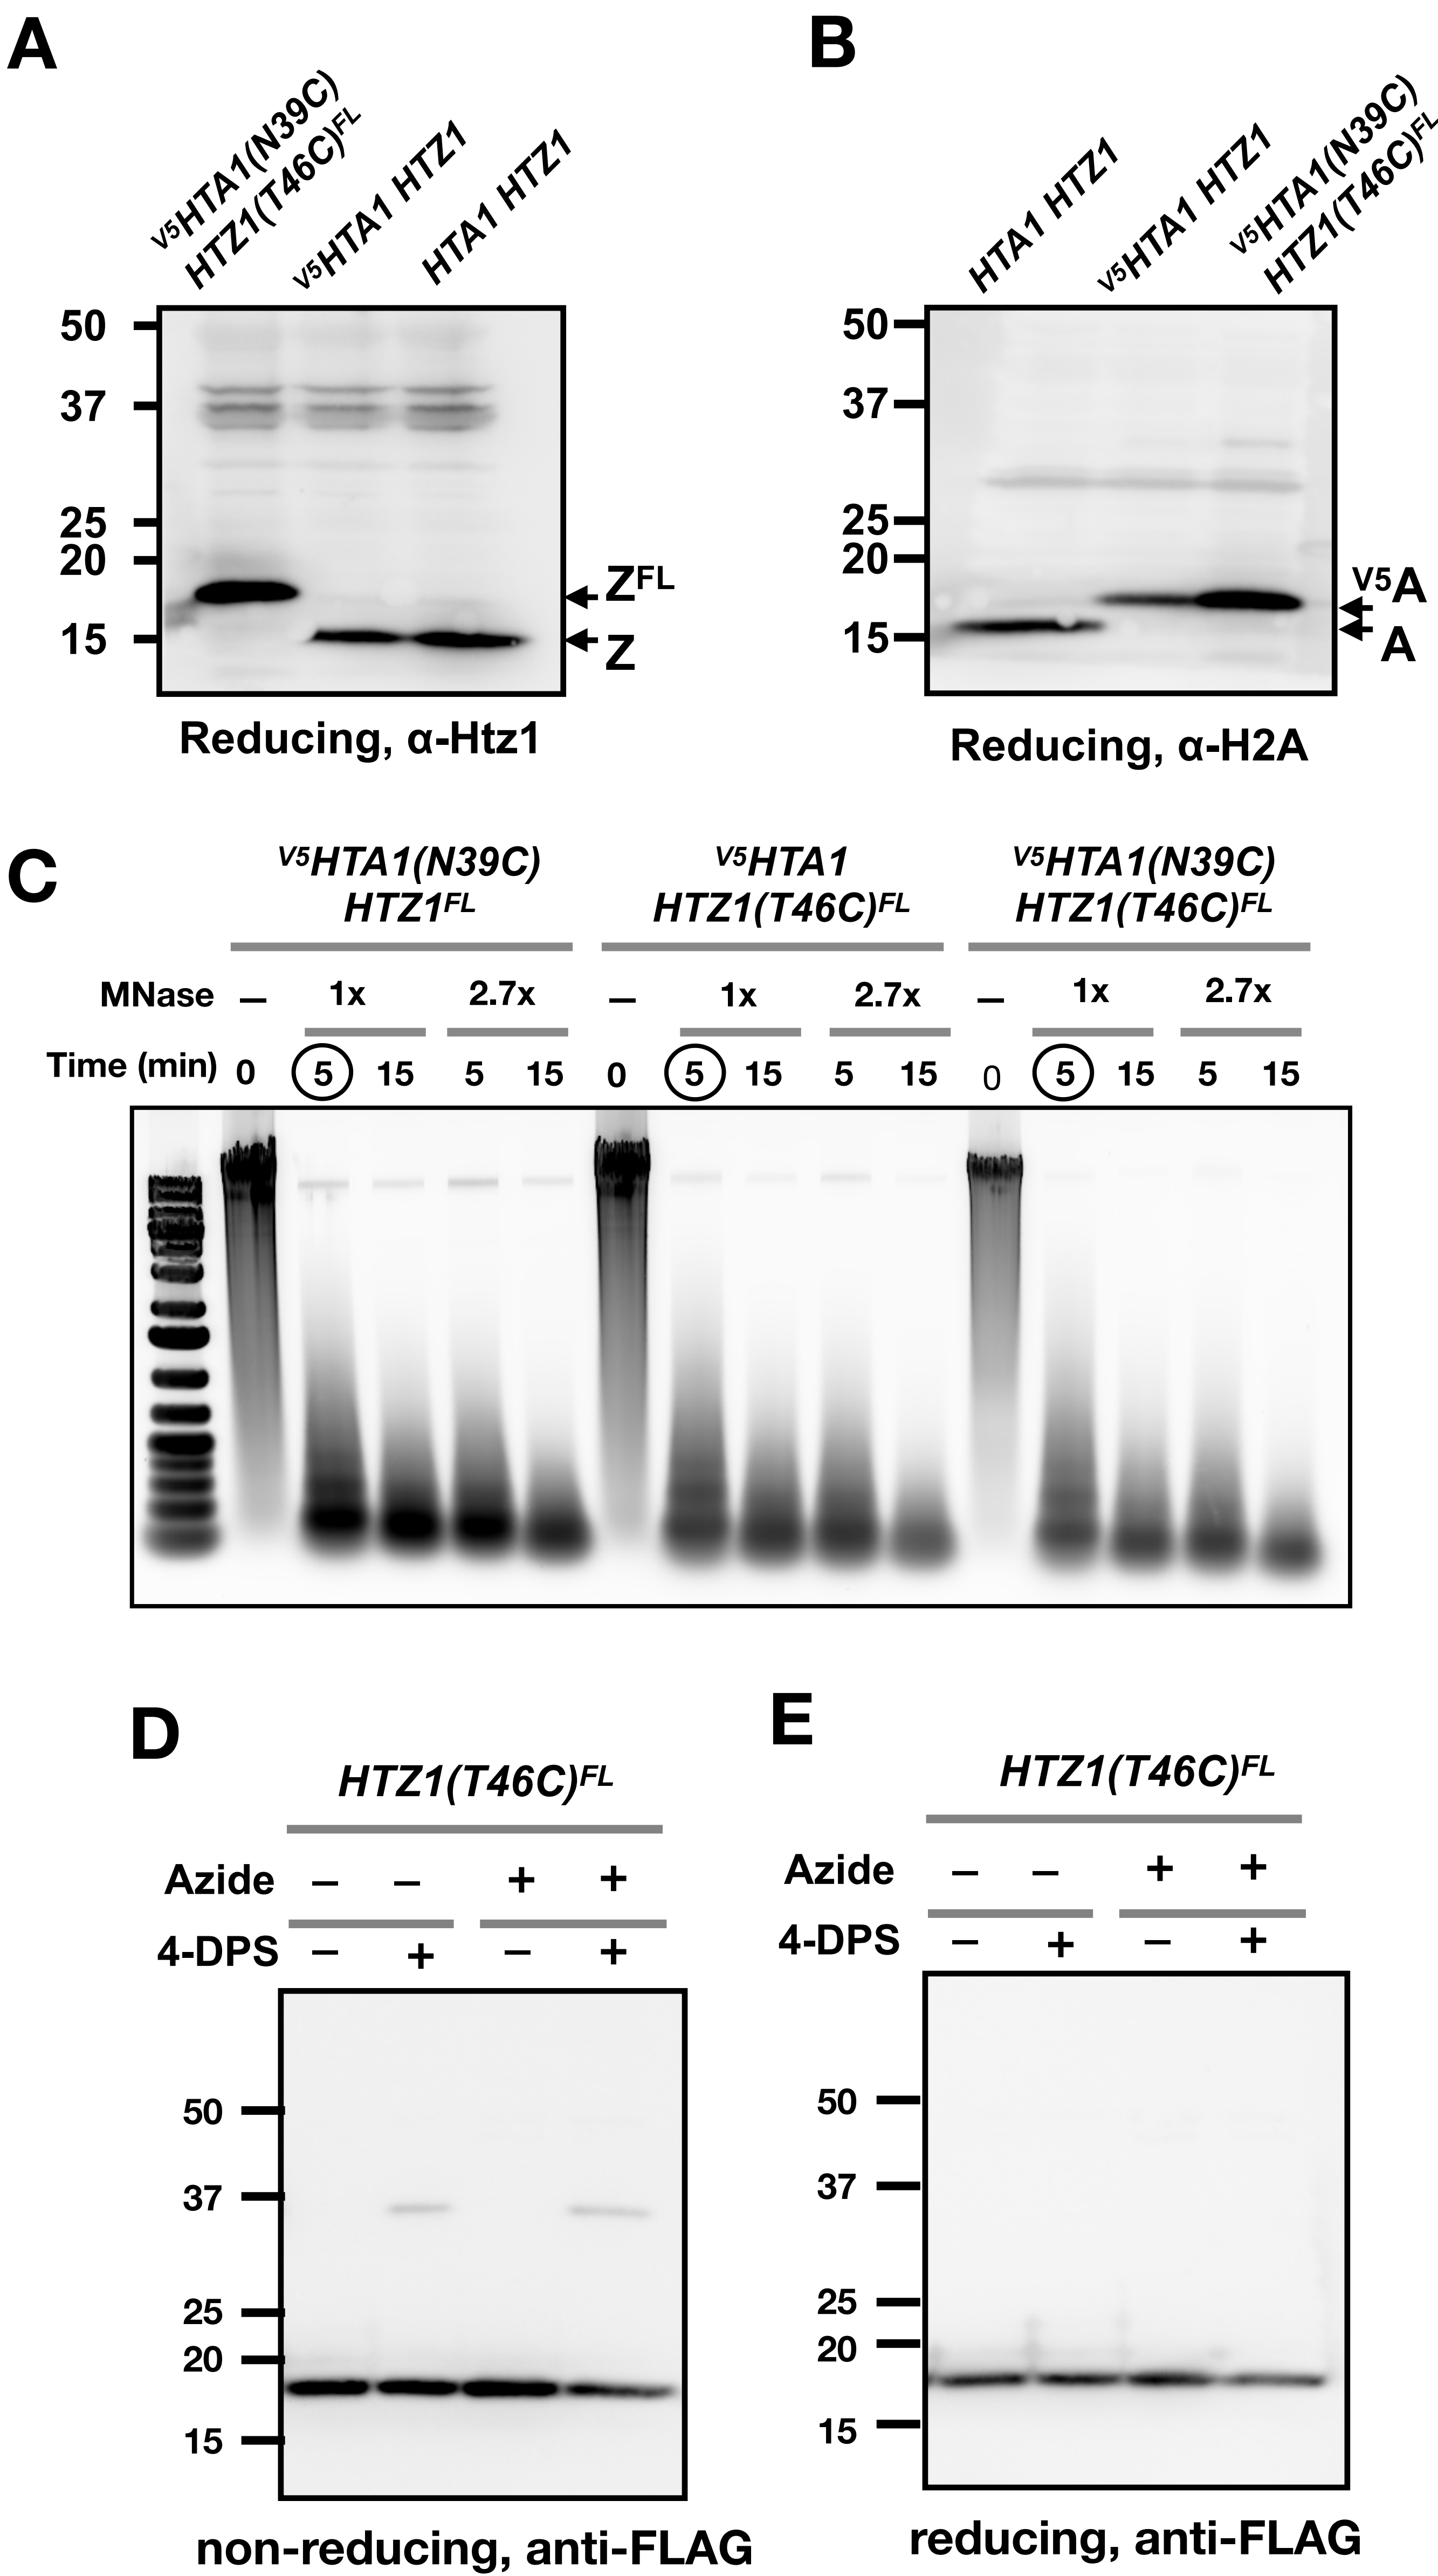

Supplement: supp [file elife_poa_e36654_Figure_3_figure_supplement_1.pdf › elife_poa_e36654_Figure_3_figure_supplement_1.pdf]

Figure 6--figure supplement 1

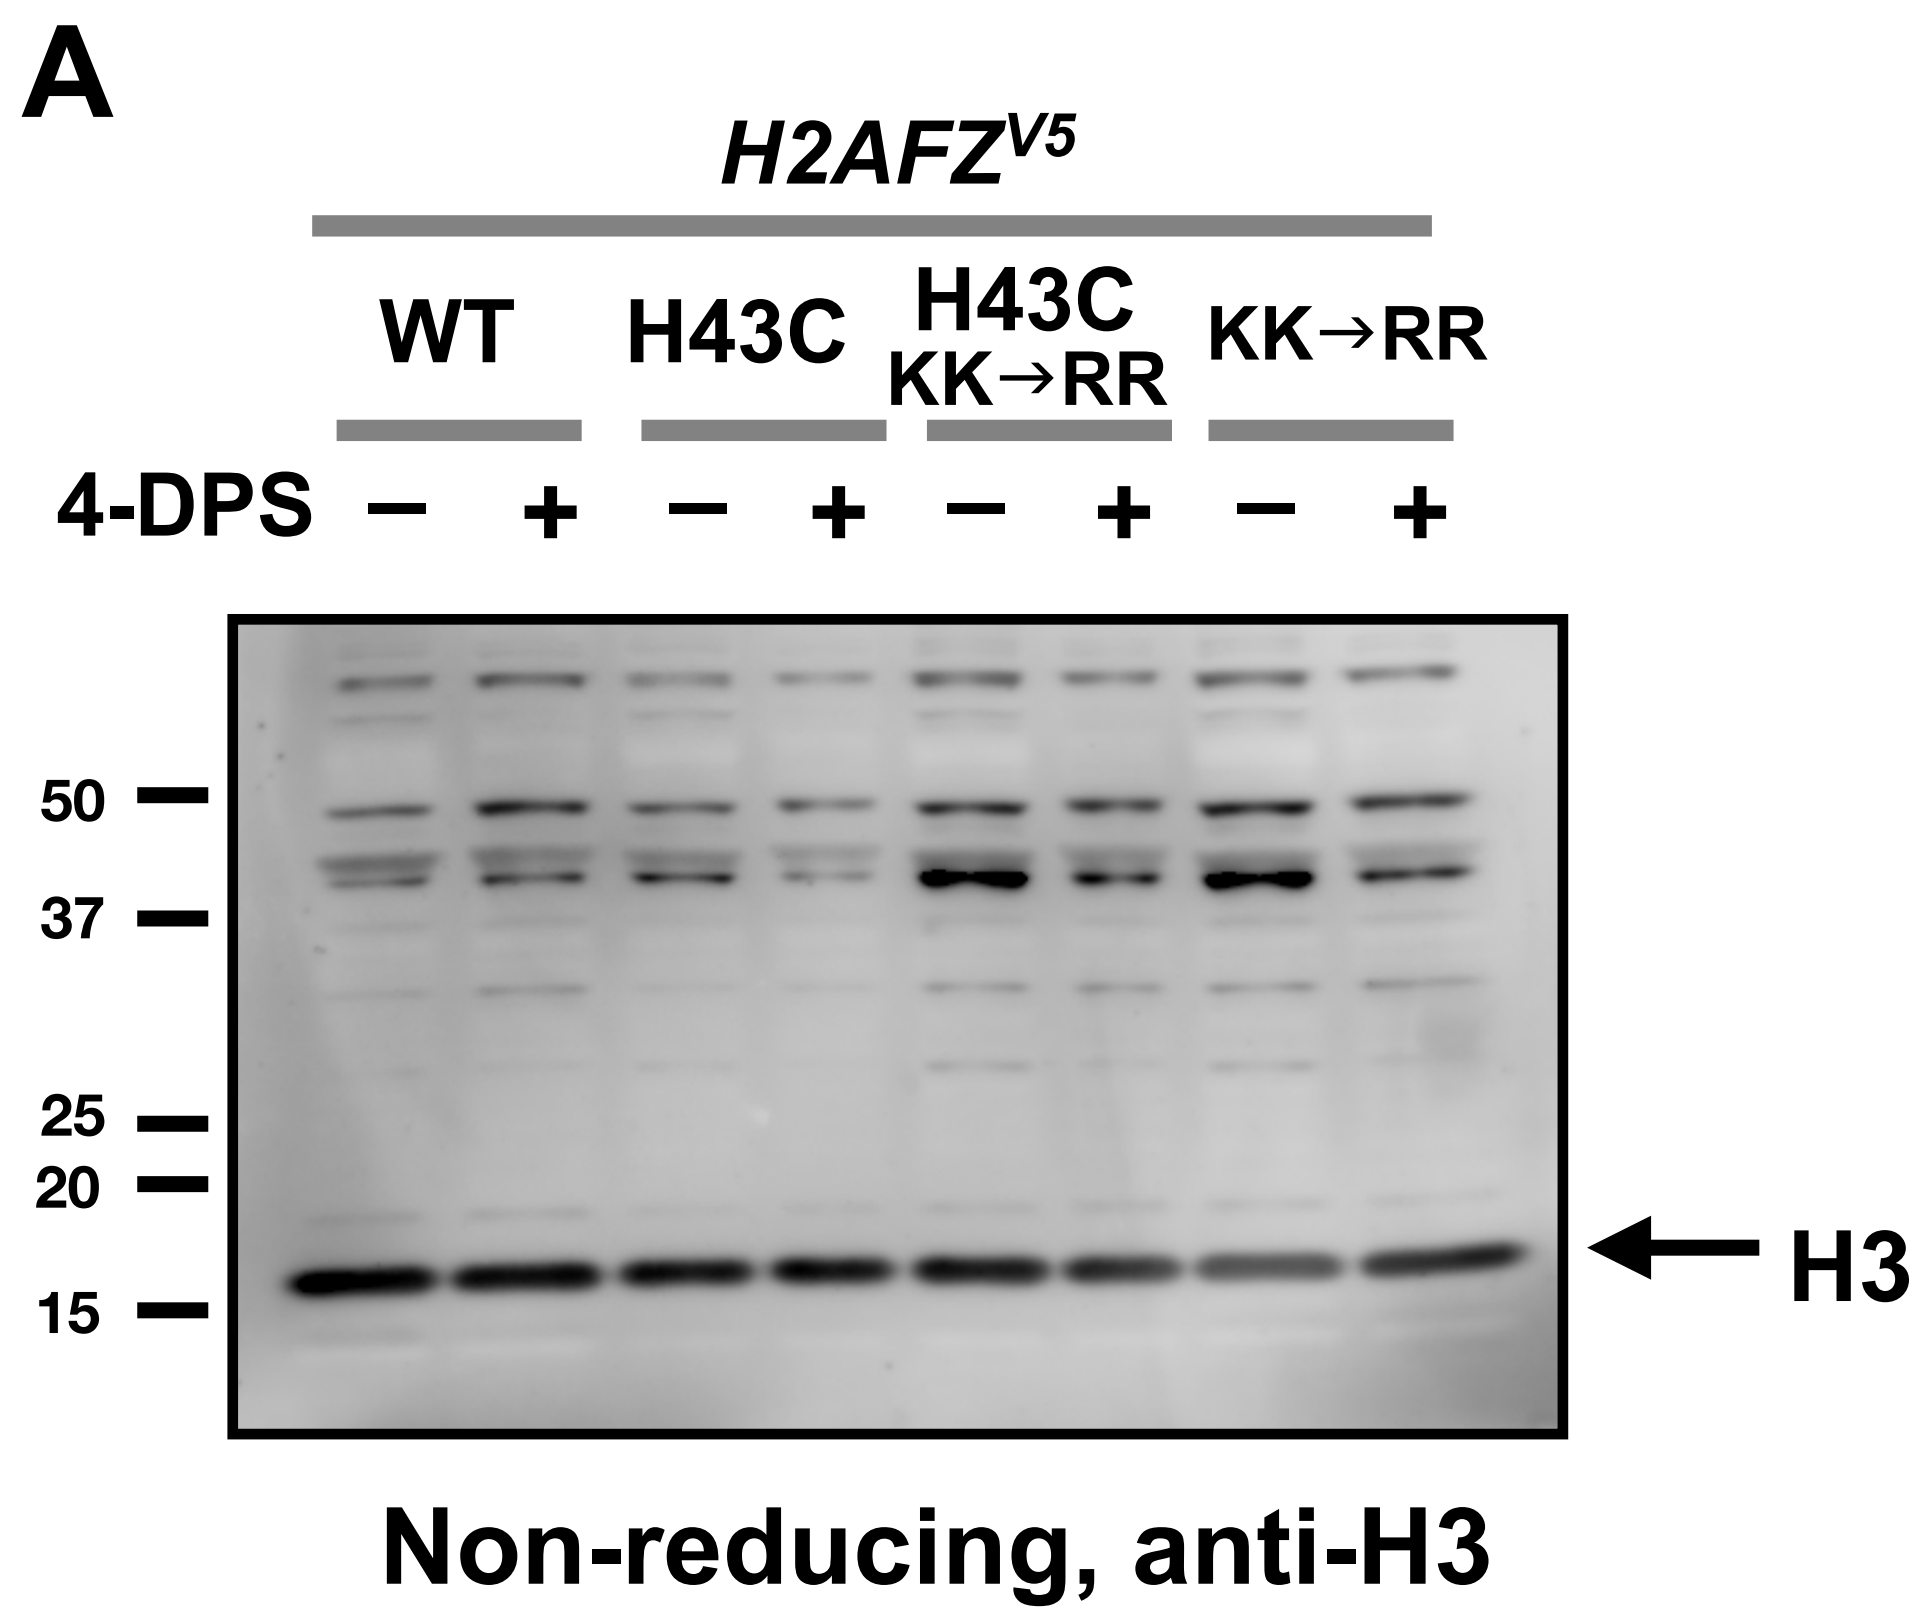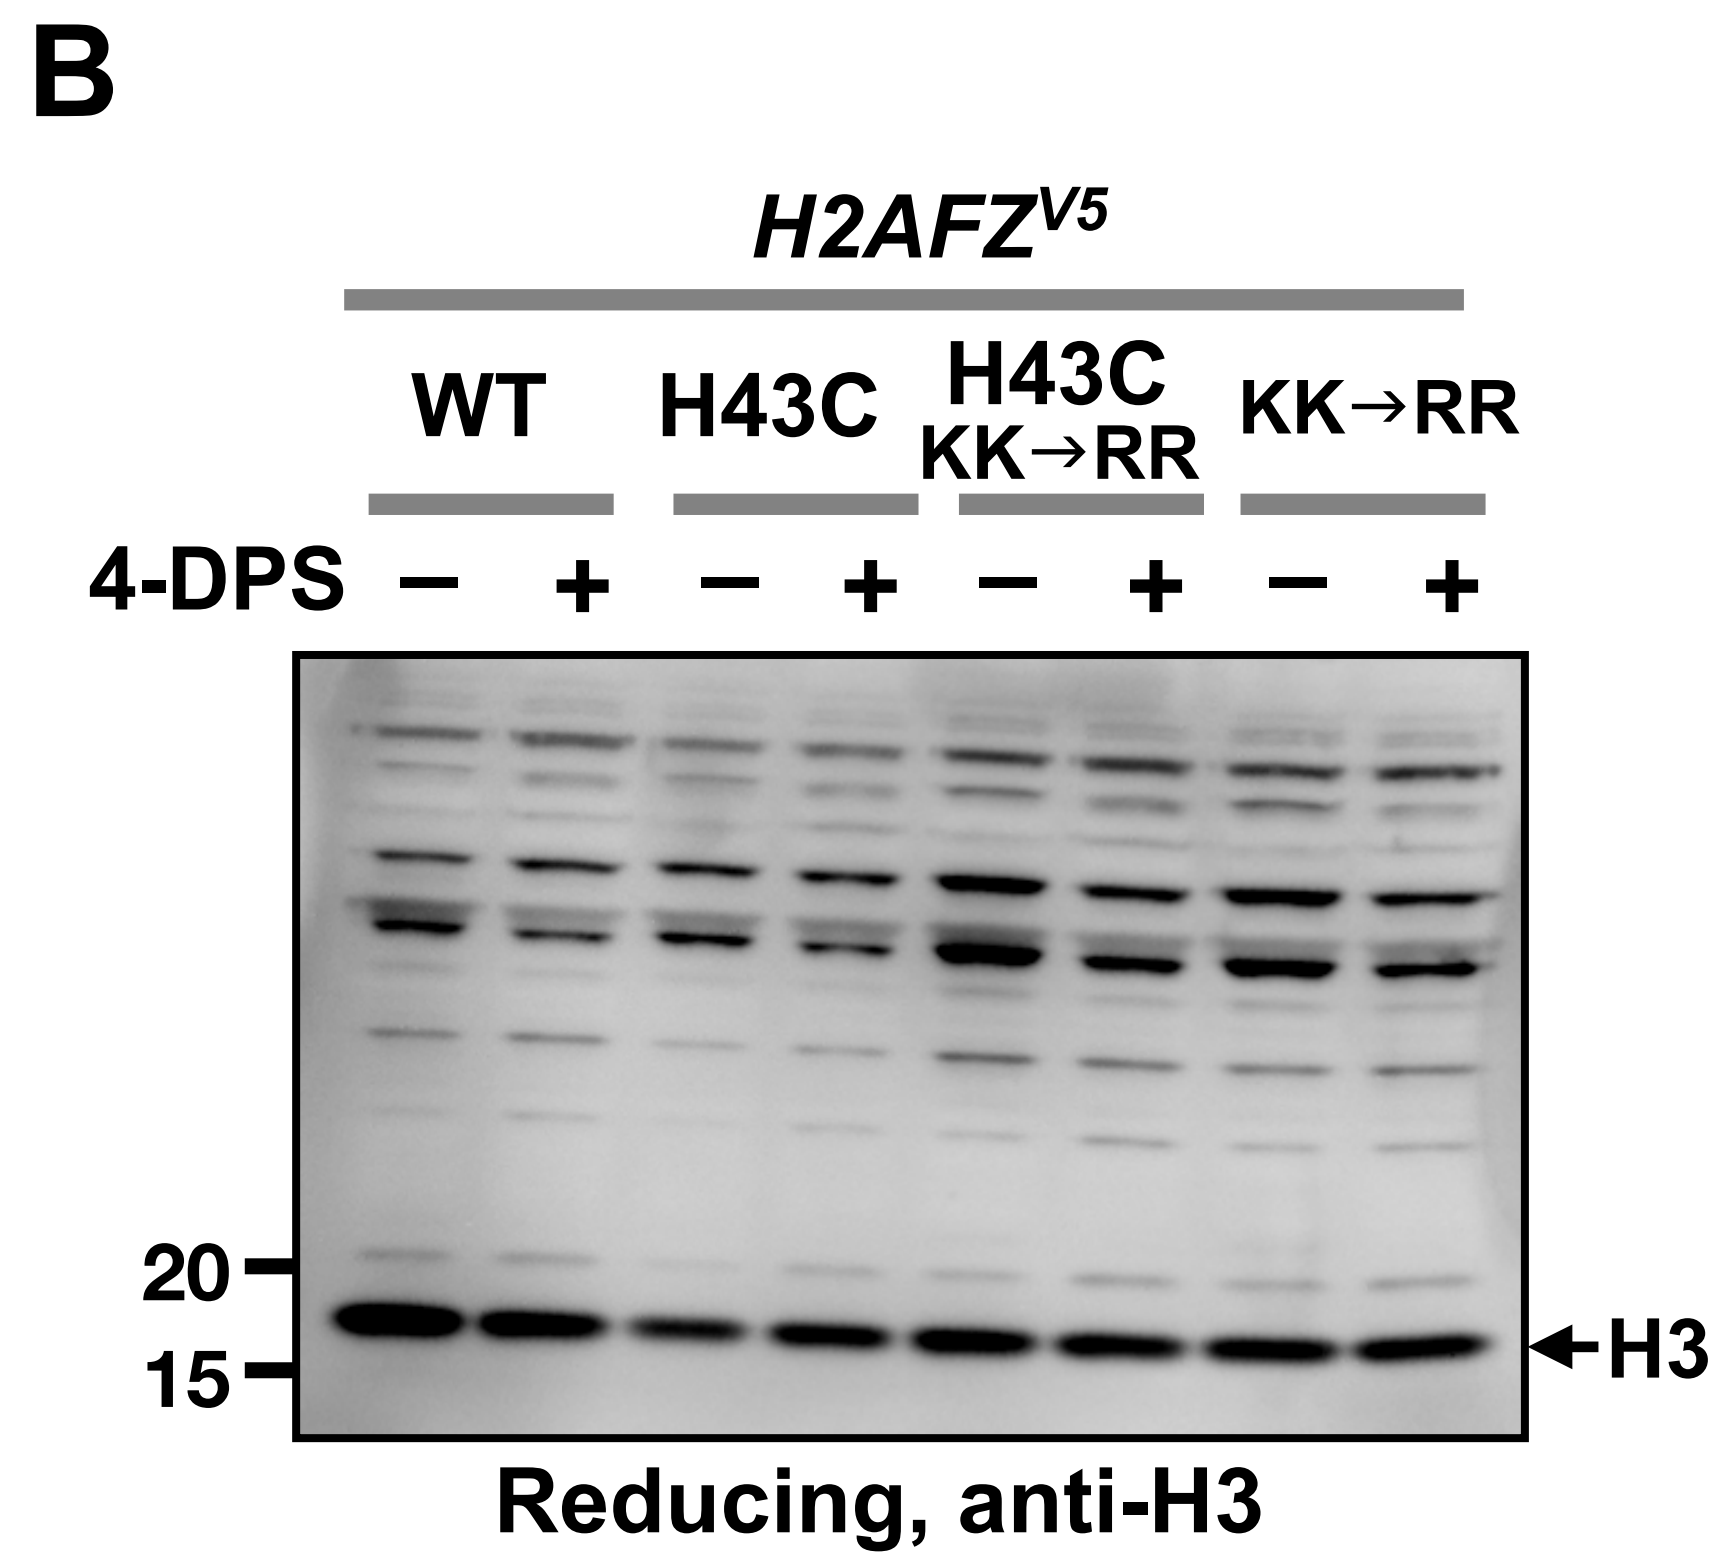

Supplement: supp [file elife_poa_e36654_Figure_6_figure_supplement_1.pdf › elife_poa_e36654_Figure_6_figure_supplement_1.pdf]

Figure 6--figure supplement 2

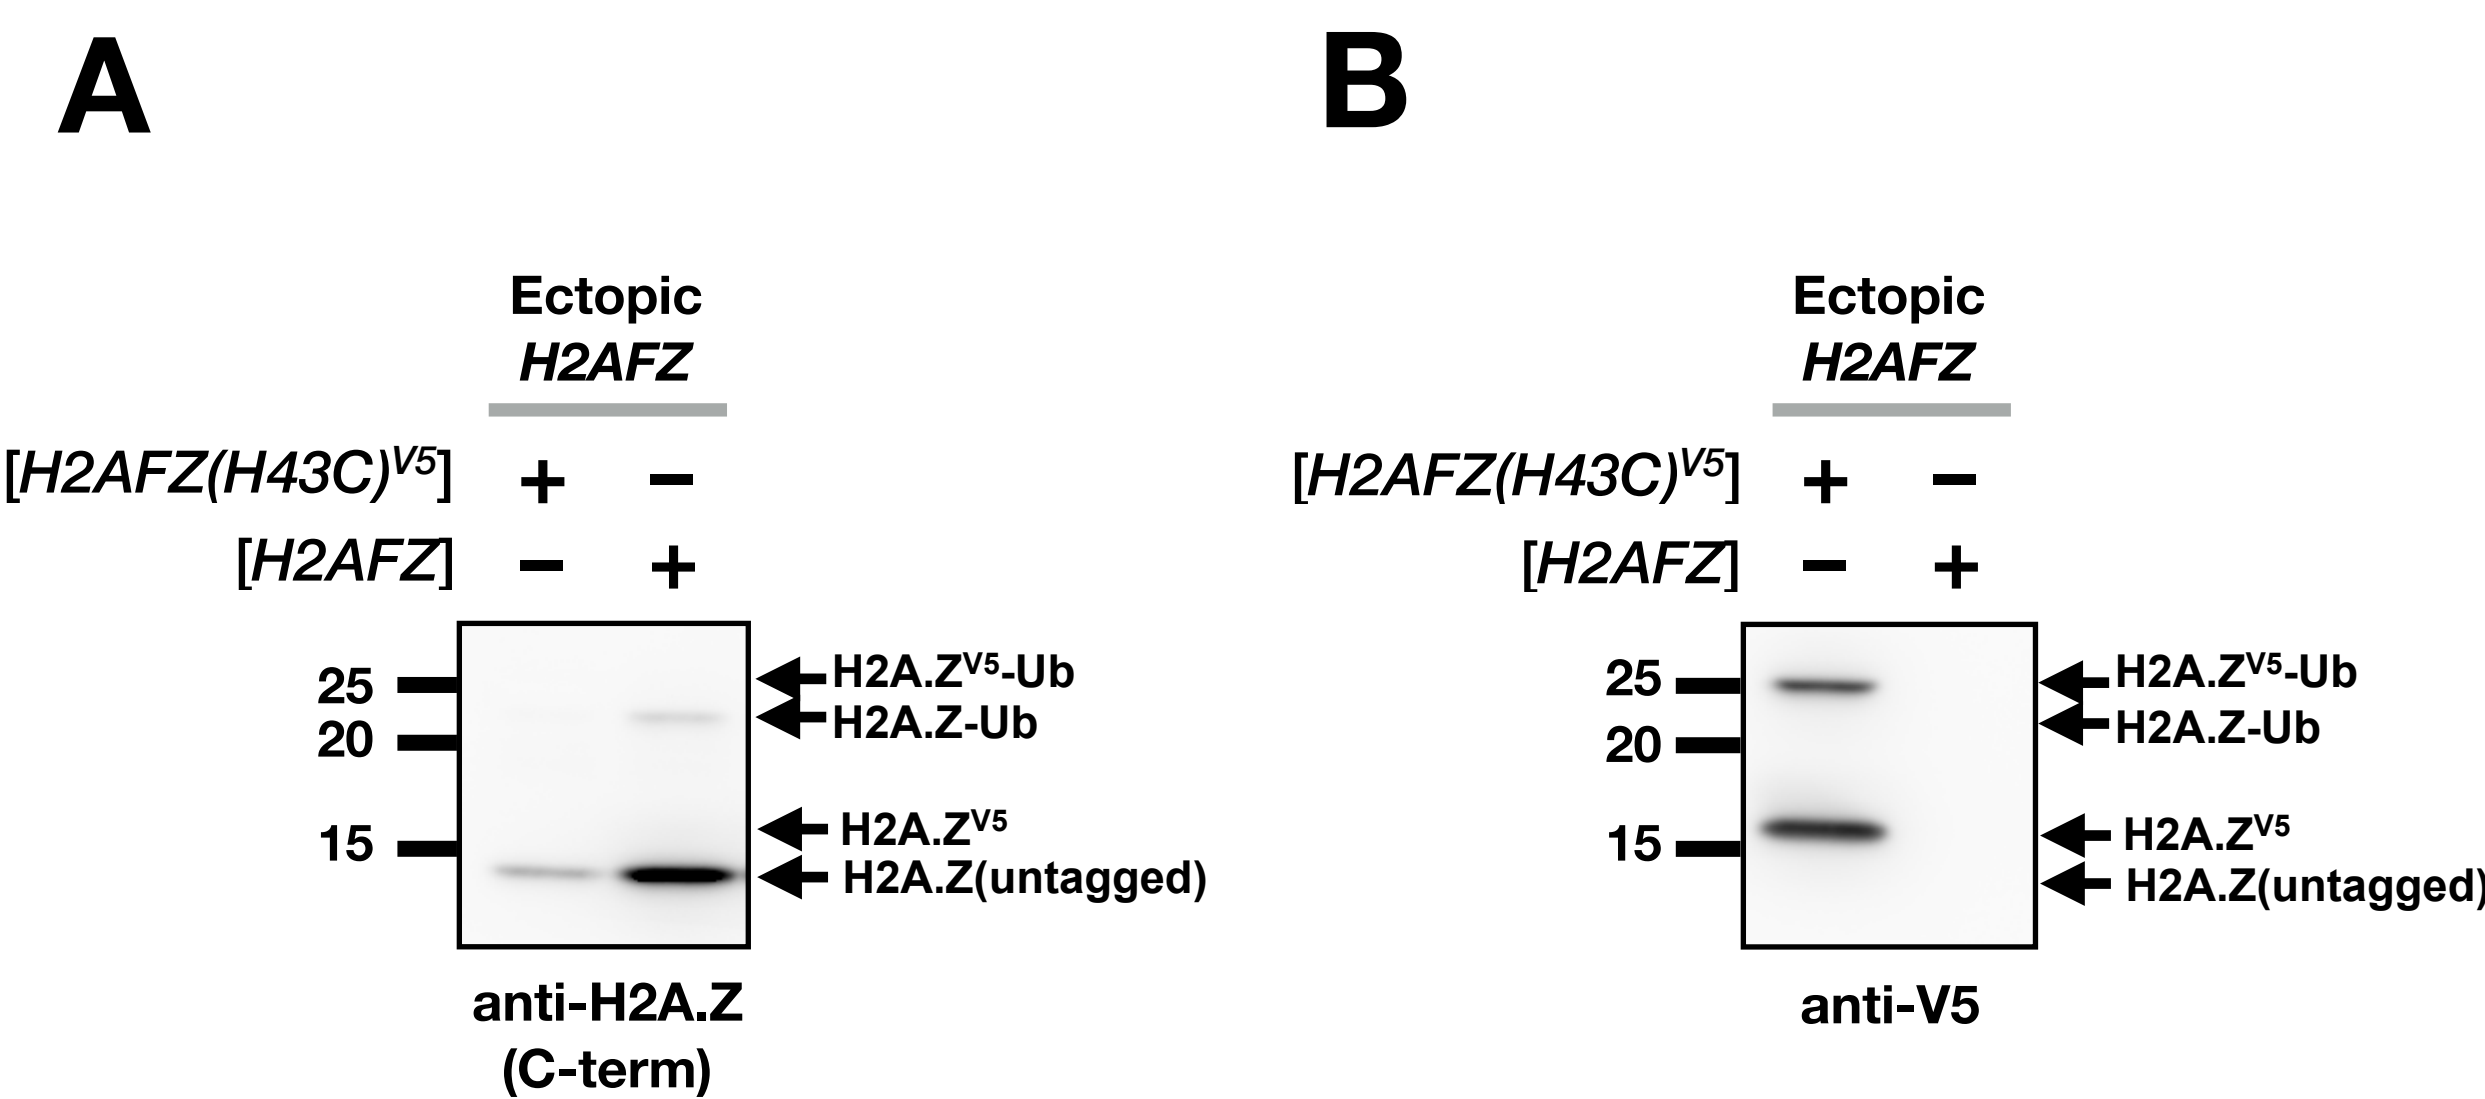

Supplement: supp [file elife_poa_e36654_Figure_6_figure_supplement_2.pdf › elife_poa_e36654_Figure_6_figure_supplement_2.pdf]
